# Supplementary material for: Spatial Frequency Analysis by Adopting Regional Analysis with Radar Rainfall in Taiwan
Source: MDPI journal article supplement (doi:10.3390/w14172710), 2022-08-31
Supplement: s1 [file s1]

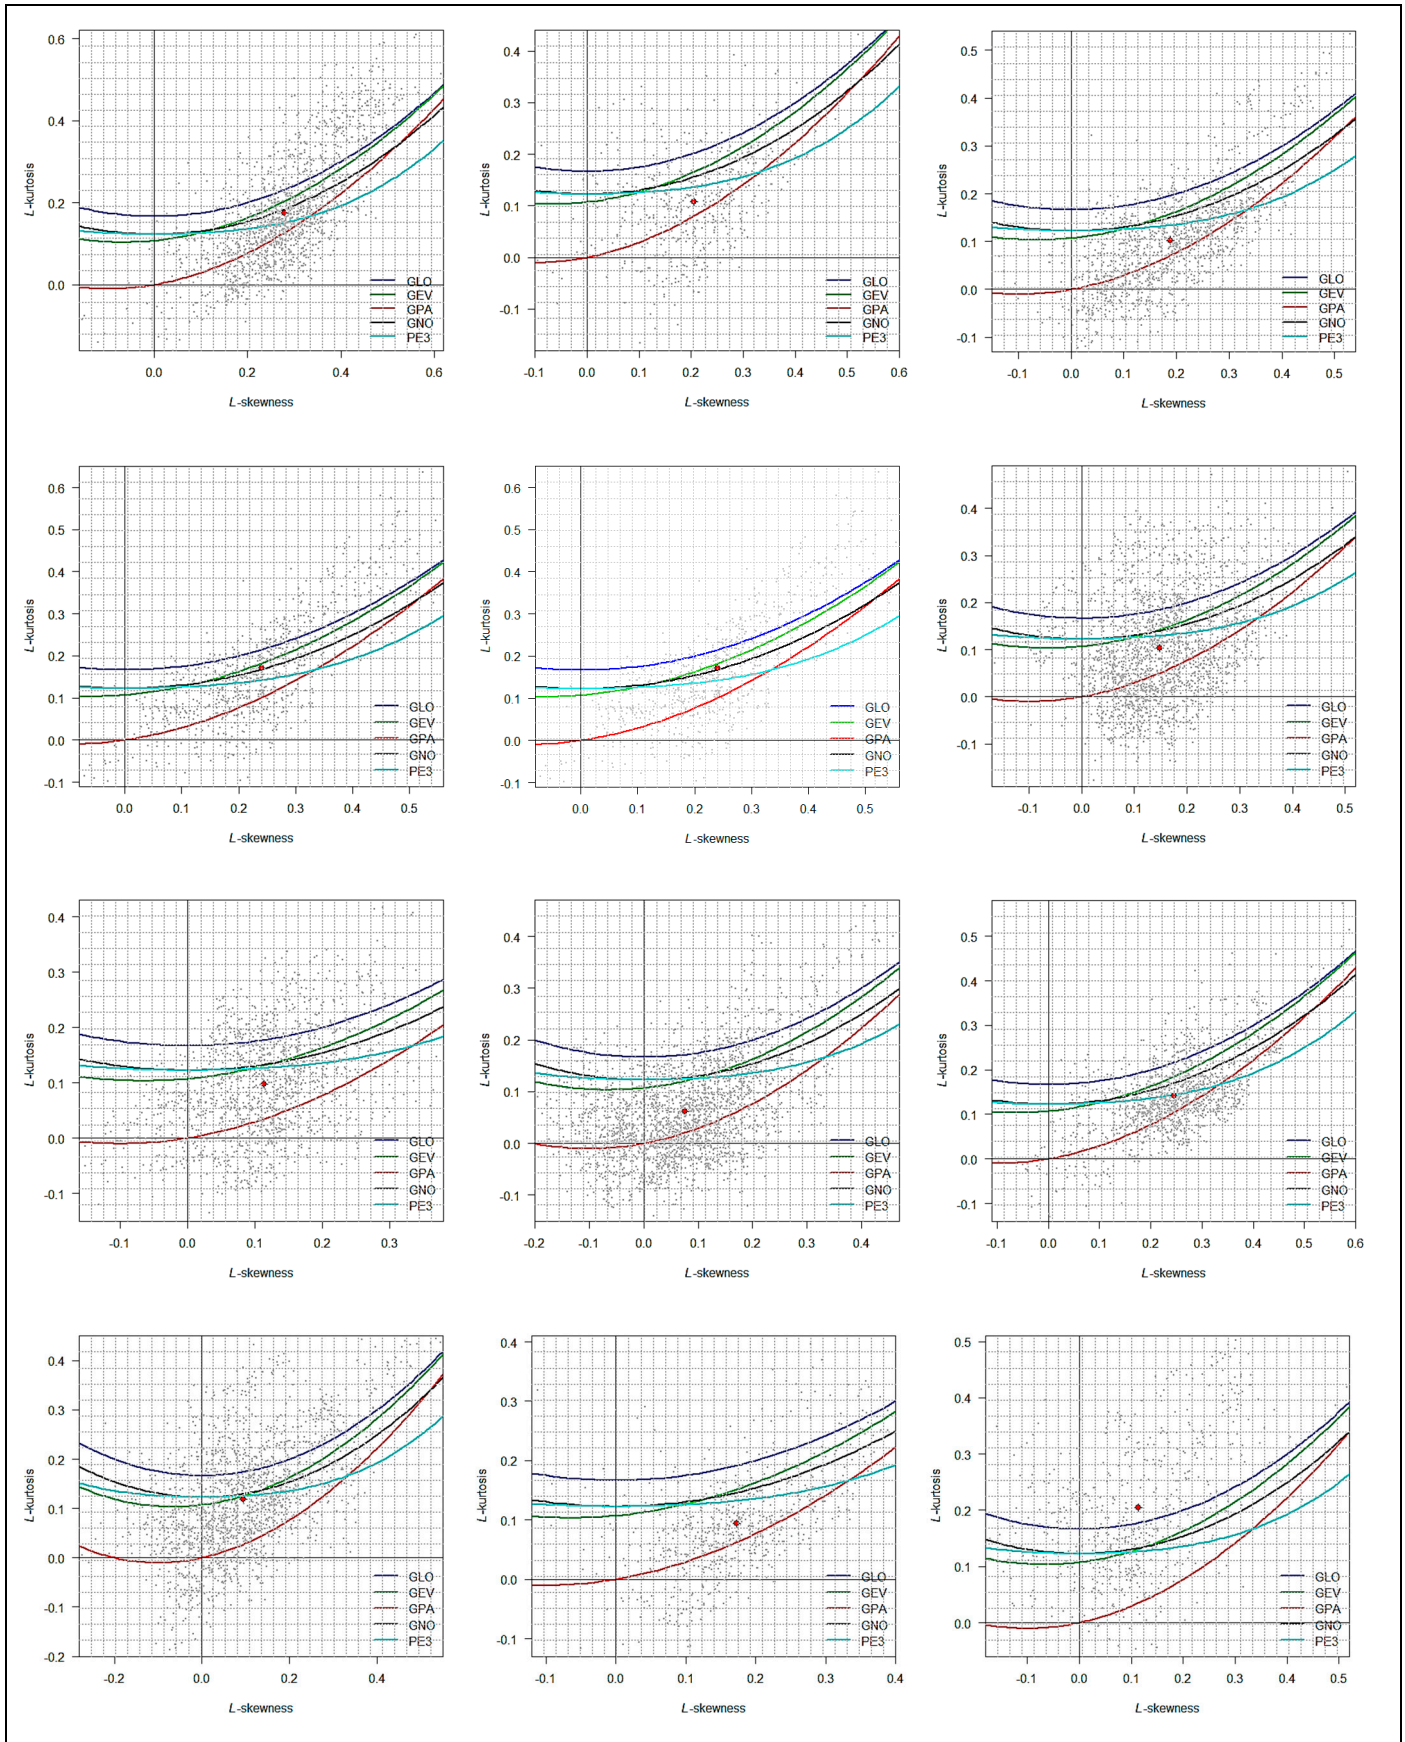

**Figure S1.** L-moment ratio diagram (LMRD) of 22 homogeneous regions in Taiwan (the gray dots are site sample L-moment ratios, the red points are the regional average L-moment ratios, and colored curves represent theoretical L-moment ratio curves of 5 candidate distributions)

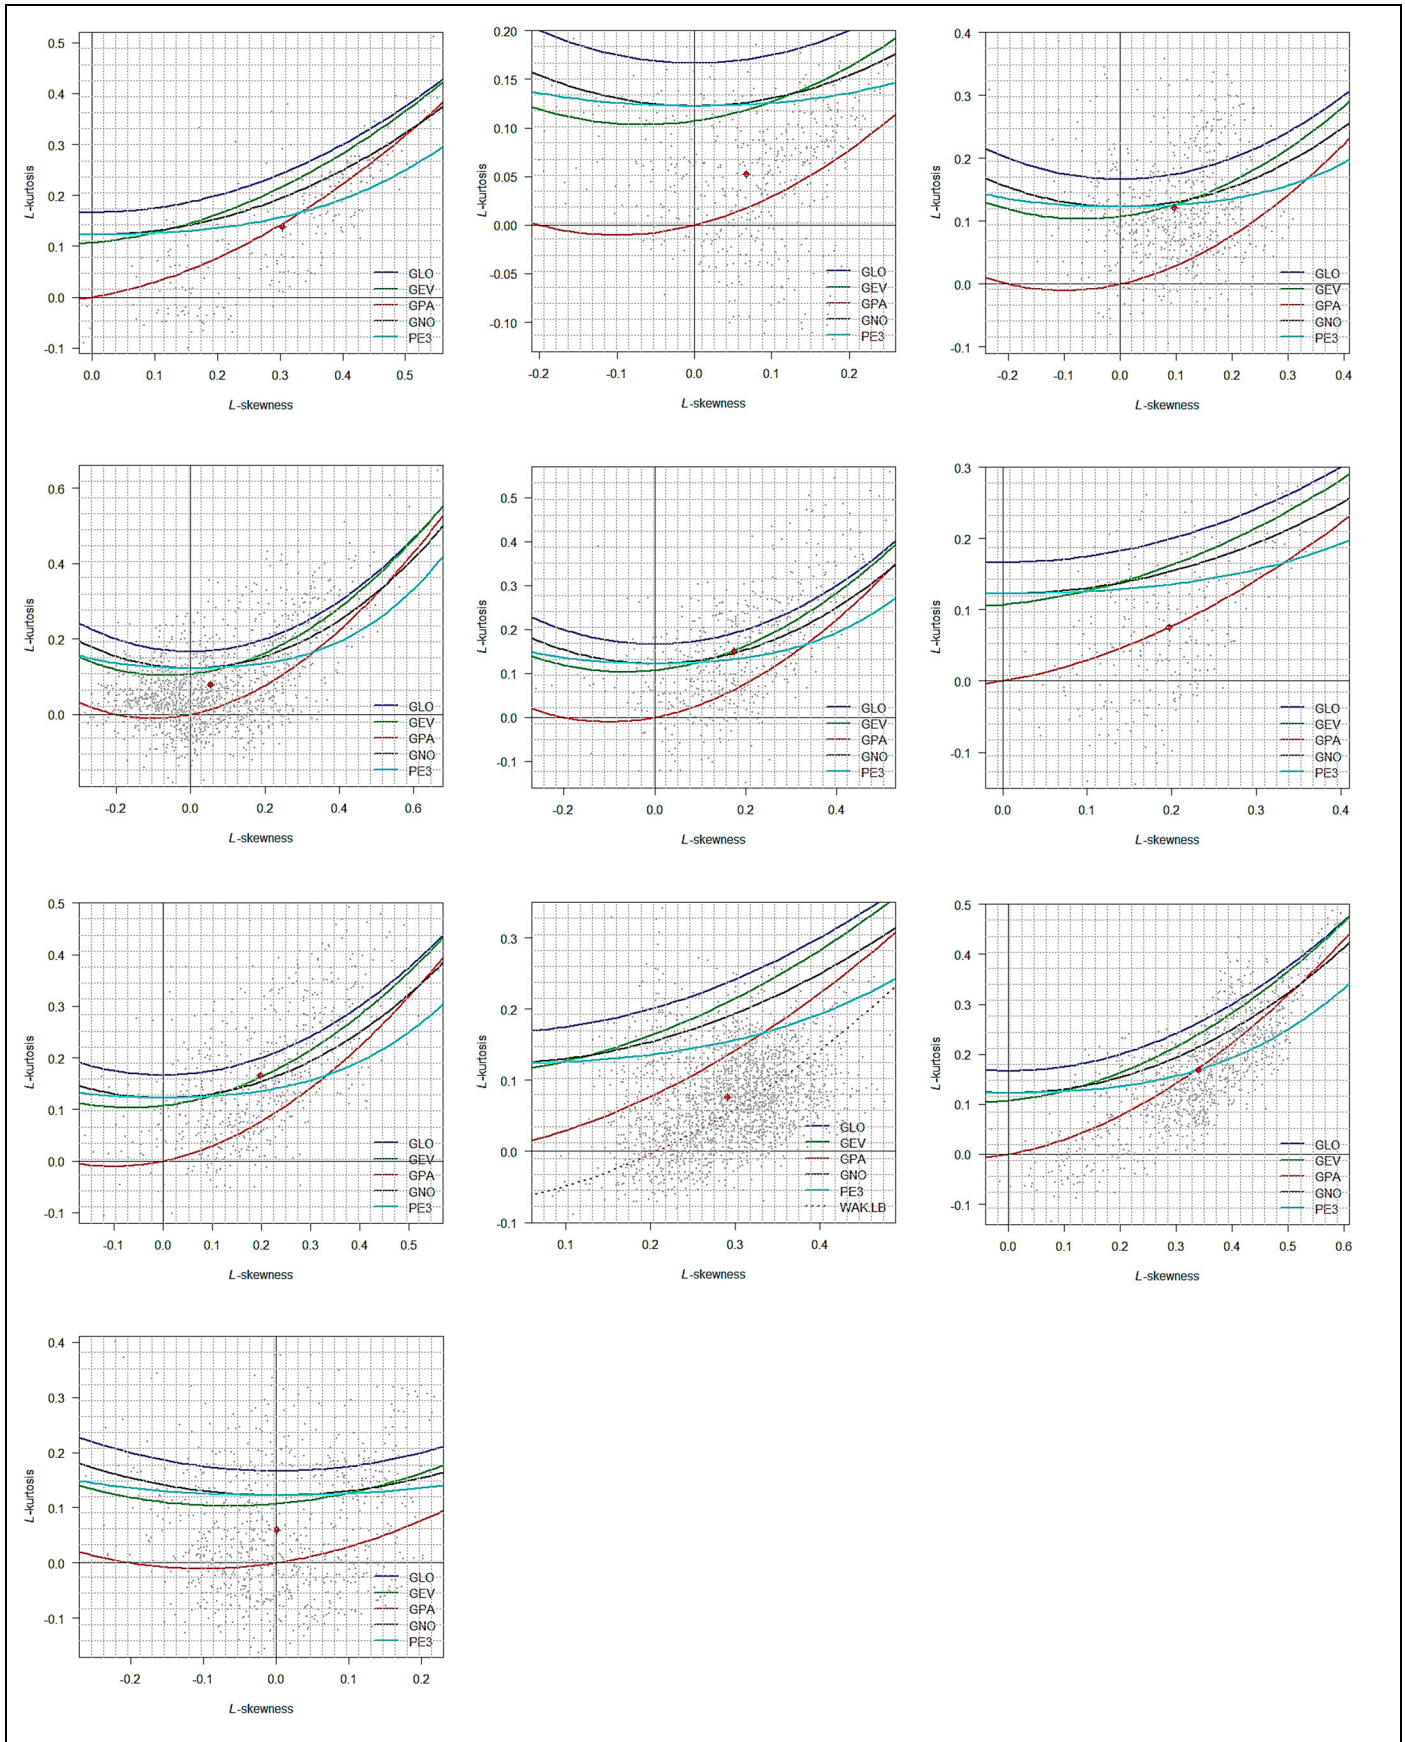

Figure S1. *Cont.*

**Table S1.** Quantile estimates with different return periods for each homogeneous sub-region

| Region/Sub-region | Return Period |      |      |      |      |      |
|-------------------|---------------|------|------|------|------|------|
|                   | 2             | 5    | 10   | 20   | 50   | 100  |
| <i>North</i>      |               |      |      |      |      |      |
| 1                 | 0.86          | 1.39 | 1.78 | 2.18 | 2.75 | 3.21 |
| 2                 | 0.91          | 1.34 | 1.59 | 1.80 | 2.01 | 2.13 |
| 3                 | 0.94          | 1.25 | 1.46 | 1.65 | 1.91 | 2.11 |
| 4                 | 0.88          | 1.29 | 1.61 | 1.93 | 2.39 | 2.77 |
| 5                 | 0.91          | 1.46 | 1.74 | 1.94 | 2.12 | 2.21 |
| 6                 | 0.92          | 1.31 | 1.58 | 1.85 | 2.21 | 2.50 |
| <i>West</i>       |               |      |      |      |      |      |
| 7                 | 0.80          | 1.38 | 1.83 | 2.28 | 2.89 | 3.35 |
| 8                 | 0.91          | 1.38 | 1.67 | 1.92 | 2.22 | 2.41 |
| 9                 | 0.89          | 1.29 | 1.60 | 1.95 | 2.49 | 3.00 |
| 10                | 0.88          | 1.35 | 1.66 | 1.97 | 2.36 | 2.65 |
| <i>Center</i>     |               |      |      |      |      |      |
| 11                | 0.82          | 1.43 | 1.86 | 2.26 | 2.75 | 3.09 |
| 12                | 0.94          | 1.38 | 1.62 | 1.82 | 2.02 | 2.13 |
| 13                | 0.99          | 1.38 | 1.55 | 1.65 | 1.73 | 1.77 |
| 14                | 0.98          | 1.36 | 1.54 | 1.67 | 1.81 | 1.89 |
| 15                | 0.98          | 1.19 | 1.37 | 1.55 | 1.82 | 2.03 |
| <i>East</i>       |               |      |      |      |      |      |
| 16                | 0.96          | 1.40 | 1.62 | 1.78 | 1.91 | 1.98 |
| 17                | 0.92          | 1.37 | 1.64 | 1.87 | 2.13 | 2.29 |
| <i>South</i>      |               |      |      |      |      |      |
| 18                | 0.97          | 1.27 | 1.44 | 1.60 | 1.78 | 1.90 |
| 19                | 0.97          | 1.23 | 1.38 | 1.52 | 1.68 | 1.79 |
| 20                | 0.99          | 1.25 | 1.38 | 1.50 | 1.63 | 1.71 |
| 21                | 0.90          | 1.39 | 1.67 | 1.89 | 2.12 | 2.25 |
| 22                | 0.80          | 1.45 | 1.92 | 2.37 | 2.93 | 3.33 |

**Table S2.** RMSE and 90 % error bounds of 22 homogeneous sub-regions with different return periods.

| Reg    | 2-year |              |       | 5-year |              |       | 10-year |              |       | 20-year |              |       | 50-year |              |       | 100-year |              |       |
|--------|--------|--------------|-------|--------|--------------|-------|---------|--------------|-------|---------|--------------|-------|---------|--------------|-------|----------|--------------|-------|
|        | RMSE   | Error Bounds |       | RMSE   | Error Bounds |       | RMSE    | Error Bounds |       | RMSE    | Error Bounds |       | RMSE    | Error Bounds |       | RMSE     | Error Bounds |       |
|        |        | Lower        | Upper |        | Lower        | Upper |         | Lower        | Upper |         | Lower        | Upper |         | Lower        | Upper |          |              |       |
| North  |        |              |       |        |              |       |         |              |       |         |              |       |         |              |       |          |              |       |
| 1      | .013   | .847         | .865  | .011   | 1.377        | 1.393 | .006    | 1.774        | 1.792 | .027    | 2.182        | 2.224 | .075    | 2.750        | 2.864 | .126     | 3.214        | 3.408 |
| 2      | .004   | .899         | .910  | .006   | 1.339        | 1.353 | .011    | 1.591        | 1.617 | .014    | 1.789        | 1.830 | .018    | 1.981        | 2.038 | .026     | 2.083        | 2.161 |
| 3      | .005   | .932         | .941  | .004   | 1.243        | 1.250 | .005    | 1.451        | 1.464 | .013    | 1.654        | 1.678 | .030    | 1.914        | 1.967 | .047     | 2.110        | 2.187 |
| 4      | .011   | .865         | .879  | .006   | 1.286        | 1.295 | .008    | 1.608        | 1.622 | .028    | 1.934        | 1.975 | .064    | 2.394        | 2.485 | .099     | 2.768        | 2.909 |
| 5      | .003   | .906         | .914  | .006   | 1.461        | 1.473 | .007    | 1.736        | 1.755 | .008    | 1.926        | 1.949 | .021    | 2.086        | 2.121 | .036     | 2.157        | 2.213 |
| 6      | .007   | .904         | .915  | .006   | 1.301        | 1.309 | .005    | 1.578        | 1.591 | .017    | 1.851        | 1.882 | .042    | 2.214        | 2.286 | .067     | 2.497        | 2.608 |
| West   |        |              |       |        |              |       |         |              |       |         |              |       |         |              |       |          |              |       |
| 7      | .011   | .785         | .801  | .009   | 1.369        | 1.383 | .007    | 1.830        | 1.844 | .035    | 2.282        | 2.332 | .090    | 2.887        | 3.018 | .146     | 3.351        | 3.566 |
| 8      | .005   | .901         | .910  | .004   | 1.374        | 1.386 | .008    | 1.664        | 1.684 | .011    | 1.916        | 1.944 | .014    | 2.203        | 2.241 | .021     | 2.384        | 2.444 |
| 9      | .017   | .871         | .890  | .012   | 1.275        | 1.289 | .005    | 1.596        | 1.608 | .032    | 1.945        | 1.989 | .091    | 2.493        | 2.614 | .158     | 2.995        | 3.207 |
| 10     | .008   | .871         | .882  | .002   | 1.342        | 1.347 | .009    | 1.665        | 1.680 | .020    | 1.971        | 2.002 | .036    | 2.364        | 2.417 | .049     | 2.654        | 2.726 |
| Center |        |              |       |        |              |       |         |              |       |         |              |       |         |              |       |          |              |       |
| 11     | .009   | .808         | .820  | .005   | 1.425        | 1.439 | .017    | 1.858        | 1.883 | .029    | 2.257        | 2.305 | .043    | 2.746        | 2.828 | .052     | 3.088        | 3.196 |
| 12     | .004   | .934         | .943  | .004   | 1.373        | 1.384 | .005    | 1.618        | 1.636 | .006    | 1.810        | 1.829 | .013    | 1.993        | 2.025 | .020     | 2.094        | 2.138 |
| 13     | .004   | .986         | .995  | .004   | 1.379        | 1.390 | .005    | 1.543        | 1.559 | .005    | 1.643        | 1.660 | .011    | 1.710        | 1.737 | .017     | 1.734        | 1.771 |
| 14     | .005   | .967         | .982  | .005   | 1.352        | 1.367 | .009    | 1.520        | 1.553 | .012    | 1.647        | 1.691 | .014    | 1.783        | 1.823 | .021     | 1.855        | 1.916 |
| 15     | .006   | .967         | .977  | .006   | 1.183        | 1.195 | .005    | 1.357        | 1.373 | .012    | 1.549        | 1.571 | .035    | 1.816        | 1.870 | .061     | 2.035        | 2.134 |
| East   |        |              |       |        |              |       |         |              |       |         |              |       |         |              |       |          |              |       |
| 16     | .003   | .956         | .965  | .003   | 1.398        | 1.407 | .004    | 1.612        | 1.625 | .009    | 1.759        | 1.775 | .018    | 1.885        | 1.913 | .024     | 1.945        | 1.983 |
| 17     | .006   | .909         | .923  | .005   | 1.365        | 1.380 | .010    | 1.631        | 1.660 | .013    | 1.859        | 1.895 | .016    | 2.103        | 2.155 | .023     | 2.254        | 2.329 |
| South  |        |              |       |        |              |       |         |              |       |         |              |       |         |              |       |          |              |       |
| 18     | .002   | .964         | .967  | .002   | 1.262        | 1.267 | .002    | 1.439        | 1.446 | .004    | 1.595        | 1.606 | .009    | 1.777        | 1.795 | .013     | 1.900        | 1.926 |
| 19     | .003   | .967         | .972  | .002   | 1.226        | 1.232 | .003    | 1.378        | 1.389 | .006    | 1.509        | 1.529 | .010    | 1.670        | 1.699 | .014     | 1.782        | 1.820 |
| 20     | .003   | .987         | .995  | .003   | 1.244        | 1.254 | .005    | 1.372        | 1.390 | .006    | 1.485        | 1.505 | .008    | 1.611        | 1.639 | .013     | 1.693        | 1.736 |
| 21     | .004   | .891         | .904  | .003   | 1.384        | 1.395 | .006    | 1.662        | 1.683 | .014    | 1.874        | 1.920 | .025    | 2.083        | 2.167 | .034     | 2.198        | 2.313 |
| 22     | .010   | .783         | .801  | .009   | 1.438        | 1.459 | .009    | 1.915        | 1.940 | .032    | 2.362        | 2.428 | .076    | 2.919        | 3.068 | .118     | 3.318        | 3.545 |
